# Supplementary material for: Hypoxia-Inducible Factor-2α Activation Promotes Colorectal Cancer Progression by Dysregulating Iron Homeostasis
Source: Oxford University Press journal article supplement (doi:10.1158/0008-5472.can-11-3836), 2012-03-14
Supplement: 00085472can113836-sup-can_11-3836_f5_t3_417k.pdf [file 00085472can113836-sup-can_11-3836_f5_t3_417k.pdf]

Supplemental Data: Figures 1-5 and Tables 1-3

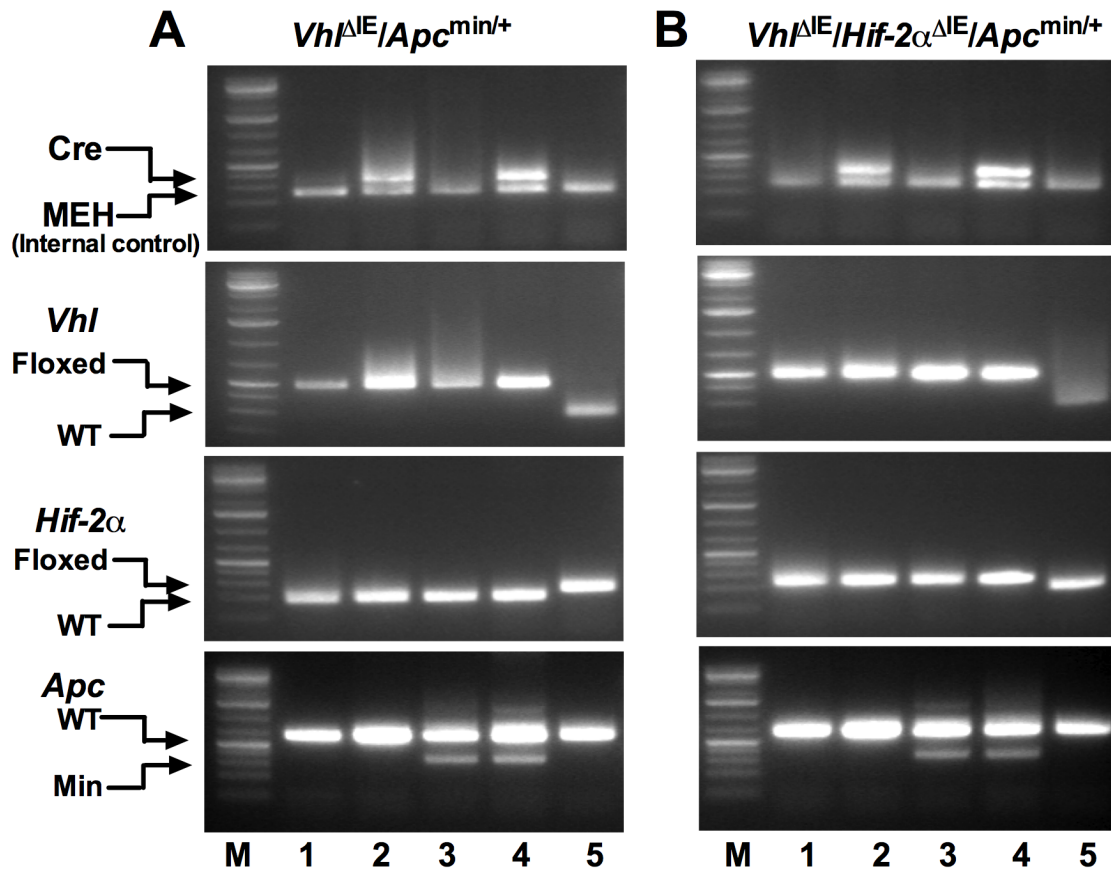

Supplemental Figure 1 Representative genotyping for  $Vhl^{\Delta IE}/Apc^{min/+}$  and  $Vhl^{\Delta IE}/Hif-2\alpha^{\Delta IE}/Apc^{min/+}$  mouse lines.

(A) Tail DNA was extracted and genotyping for *Cre*, *Vhl*, *Hif-2 $\alpha$*  and *Apc* were performed in  $Vhl^{\Delta IE}/Apc^{min/+}$  mouse line. M, marker; 1,  $Vhl^{F/F}$ ; 2,  $Vhl^{\Delta IE}$ ; 3,  $Vhl^{F/F}/Apc^{min/+}$ ; 4,  $Vhl^{\Delta IE}/Apc^{min/+}$ ; 5,  $Hif-2\alpha^{\Delta IE}$ . (B) Tail DNA was extracted and genotyping for *Cre*, *Vhl*, *Hif-2 $\alpha$*  and *Apc* were performed in  $Vhl^{\Delta IE}/Hif-2\alpha^{\Delta IE}/Apc^{min/+}$  mouse line. M, marker; 1,  $Vhl^{F/F}/Hif-2\alpha^{F/F}$ ; 2,  $Vhl^{\Delta IE}/Hif-2\alpha^{\Delta IE}$ ; 3,  $Vhl^{F/F}/Hif-2\alpha^{F/F}/Apc^{min/+}$ ; 4,  $Vhl^{\Delta IE}/Hif-2\alpha^{\Delta IE}/Apc^{min/+}$ ; 5,  $Vhl^{F/F}$ .

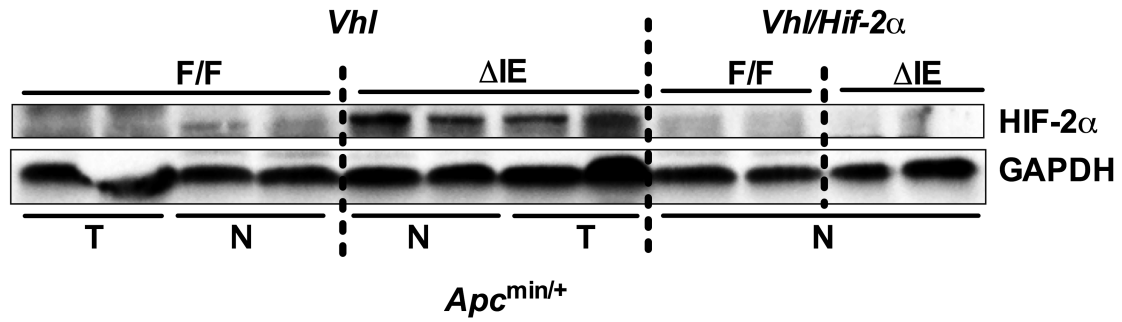

**Supplemental Figure 2 HIF-2 $\alpha$  Expression in the colons of *Vhl<sup>ΔIE</sup>/Apc<sup>min/+</sup>*, *Vhl<sup>ΔIE</sup>/Hif-2 $\alpha$ <sup>ΔIE</sup>/Apc<sup>min/+</sup>* and their wild-type littermate control mice.**

Western Blot analysis for HIF-2 $\alpha$  and GAPDH from normal and tumor colon tissues of 6-month-old *Vhl<sup>F/F</sup>/Apc<sup>min/+</sup>*, *Vhl<sup>ΔIE</sup>/Apc<sup>min/+</sup>*, *Vhl<sup>F/F</sup>/Hif-2 $\alpha$ <sup>F/F</sup>/Apc<sup>min/+</sup>* and *Vhl<sup>ΔIE</sup>/Hif-2 $\alpha$ <sup>ΔIE</sup>/Apc<sup>min/+</sup>* mice. N, normal tissue; T, tumor tissue.

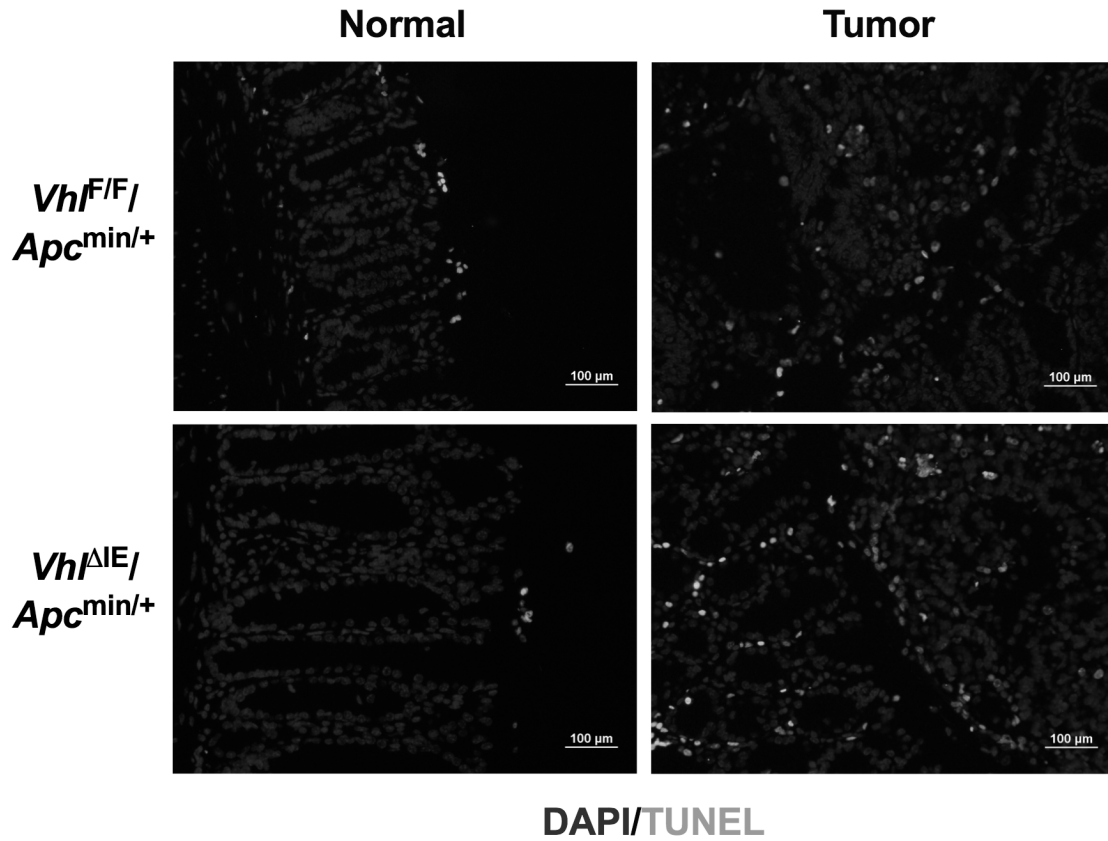

**Supplemental Figure 3 TUNEL assay in the normal and tumor colons of *Vhl*<sup>F/F</sup>/*Apc*<sup>min/+</sup> and *Vhl*<sup>ΔE</sup>/*Apc*<sup>min/+</sup> mice.**

TUNEL assay for the normal and tumor colons of 6-month-old *Vhl*<sup>F/F</sup>/*Apc*<sup>min/+</sup> and *Vhl*<sup>ΔE</sup>/*Apc*<sup>min/+</sup> mice.

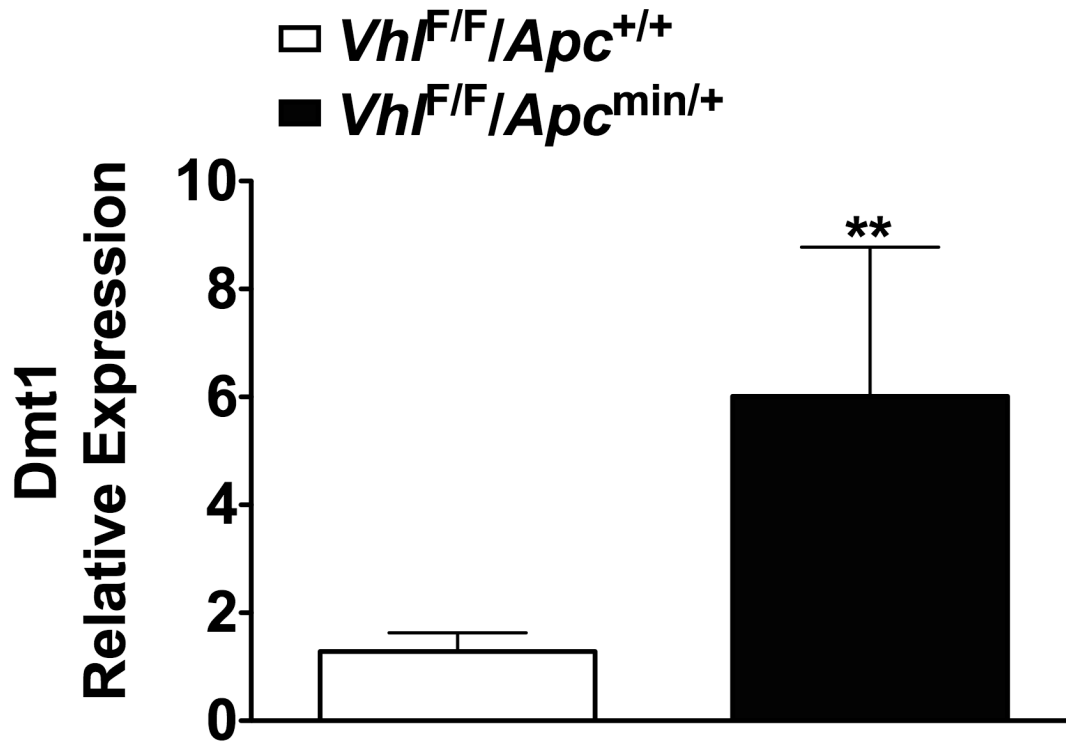

Supplemental Figure 4 DMT-1 Expression in the small intestine of  $Vhl^{F/F}/Apc^{min/+}$  mice.

qPCR analysis in the small intestine of  $Vhl^{F/F}/Apc^{min/+}$  and  $Vhl^{F/F}/Apc^{+/+}$  mice. Each bar represents the mean value  $\pm$  S.D. \*\* $p < 0.01$  compared to  $Vhl^{F/F}/Apc^{+/+}$  mice.

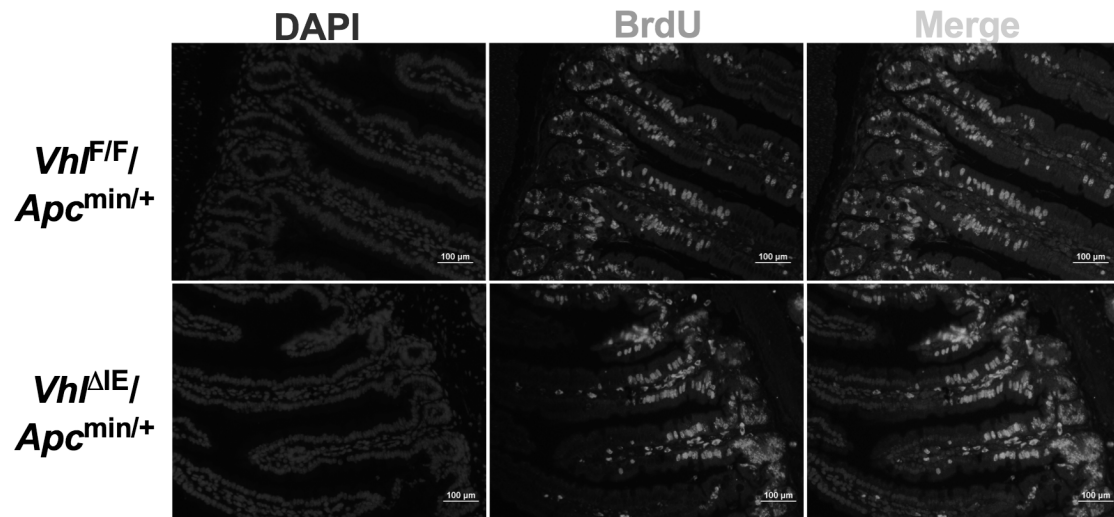

**Supplemental Figure 5 Disruption of *Vhl* in the small intestine does not increase proliferation.**

BrdU staining of small intestine epithelial cells from 3-month-old *Vhl*<sup>F/F</sup>/*Apc*<sup>min/+</sup> and *Vhl*<sup>ΔE</sup>/*Apc*<sup>min/+</sup> mice.

**Supplemental Table 1 Primers List**

| <b>QPCR Primer</b> | <b>Sequence (5'-3')</b> |
|--------------------|-------------------------|
| $\beta$ -actin F   | TATTGGCAACGAGCGGTTCC    |
| $\beta$ -actin R   | GGCATAGAGGTCTTTACGGATGT |
| Ccnd1 F            | GGGTGGGTTGGAAATGAAC     |
| Ccnd1 R            | TCCTCTCCAAAATGCCAGAG    |
| Dmt1 F             | TGTTTGATTGCATTGGGTCTG   |
| Dmt1 R             | CGCTCAGCAGGACTTTCGAG    |

**Supplemental Table 2** List of top 10 changed genes from the colons of  $Vhl^{F/F}$  vs  $Vhl^{\Delta E}$  and  $Vhl^{F/F}/Apc^{\min/+}$  vs  $Vhl^{\Delta E}/Apc^{\min/+}$ .

| Symbol         | Description                                                                                | Microarray*     | Oncomine#                      |
|----------------|--------------------------------------------------------------------------------------------|-----------------|--------------------------------|
| Xist           | inactive X specific transcripts                                                            | Decrease        | Decrease (5)                   |
| Myl7           | myosin, light polypeptide 7, regulatory                                                    | Increase        | No Change                      |
| Mpp4           | membrane protein, palmitoylated 4 (MAGUK p55 subfamily member 4)                           | Increase        | No Change                      |
| Nrn1           | neuritin 1                                                                                 | Increase        | Decrease (1)                   |
| Ndufa4l2       | NADH dehydrogenase (ubiquinone) 1 alpha subcomplex, 4-like 2                               | Increase        | Increase (3)                   |
| <b>Slc11a2</b> | <b>solute carrier family 11 (proton-coupled divalent metal ion transporters), member 2</b> | <b>Increase</b> | <b>Increase (19)</b>           |
| Als2cr4        | amyotrophic lateral sclerosis 2 (juvenile) chromosome region, candidate 4                  | Increase        | Increase (14),<br>Decrease (1) |
| Dnase1l2       | deoxyribonuclease 1-like 2                                                                 | Increase        | Increase (4)                   |
| Ankrd37        | ankyrin repeat domain 37                                                                   | Increase        | Increase (1)<br>Decrease (2)   |
| Steap4         | STEAP family member 4                                                                      | Increase        | Decrease (4)                   |

\* Gene changes in  $Vhl^{\Delta E}$  compared to  $Vhl^{F/F}$  mice.

# Numbers in parenthesis indicate independent microarray reports for gene changes in colon cancer compared to normal tissue.
